# Supplementary material for: Prognostic Role of Systemic Inflammatory Markers in Patients Undergoing Surgical Resection for Oral Squamous Cell Carcinoma
Source: MDPI journal article supplement (doi:10.3390/biomedicines10061268), 2022-05-29
Supplement: s1 [file s1]

**Supplementary Table S1.** Correlation between clinicopathologic parameters and white blood cell and platelet count

| Parameter                    | No. | WBC<br>(mean ± SD) | P *    | Platelet count<br>(mean ± SD) | P *    |
|------------------------------|-----|--------------------|--------|-------------------------------|--------|
| <b>Age</b>                   |     |                    |        |                               |        |
| ≤55                          | 134 | 6.76 ± 2.33        | 0.9863 | 250.79 ± 68.11                | 0.0284 |
| >55                          | 135 | 6.77 ± 2.40        |        | 232.18 ± 70.37                |        |
| <b>Sex</b>                   |     |                    |        |                               |        |
| Male                         | 173 | 6.95 ± 2.43        | 0.0942 | 238.90 ± 71.78                | 0.4217 |
| Female                       | 96  | 6.44 ± 2.22        |        | 246.04 ± 66.06                |        |
| <b>Location</b>              |     |                    |        |                               |        |
| Tongue                       | 200 | 6.67 ± 2.31        | 0.2442 | 245.09 ± 73.34                | 0.1455 |
| Other                        | 69  | 7.05 ± 2.49        |        | 230.90 ± 57.29                |        |
| <b>Depth of invasion</b>     |     |                    |        |                               |        |
| ≤1 cm                        | 165 | 6.53 ± 2.20        | 0.0438 | 235.93 ± 58.58                | 0.1316 |
| >1 cm                        | 104 | 7.14 ± 2.56        |        | 250.20 ± 84.08                |        |
| <b>Lymphatic invasion</b>    |     |                    |        |                               |        |
| Absent                       | 196 | 6.60 ± 2.27        | 0.0565 | 237.38 ± 63.18                | 0.1711 |
| Present                      | 73  | 7.22 ± 2.56        |        | 252.36 ± 84.45                |        |
| <b>Vascular invasion</b>     |     |                    |        |                               |        |
| Absent                       | 261 | 6.79 ± 2.38        | 0.3168 | 241.46 ± 70.42                | 0.9813 |
| Present                      | 8   | 5.94 ± 1.72        |        | 240.88 ± 45.73                |        |
| <b>Perineural invasion</b>   |     |                    |        |                               |        |
| Absent                       | 192 | 6.66 ± 2.34        | 0.2530 | 241.91 ± 69.79                | 0.8634 |
| Present                      | 77  | 7.03 ± 2.42        |        | 240.29 ± 70.10                |        |
| <b>T stage</b>               |     |                    |        |                               |        |
| T1&T2                        | 155 | 6.46 ± 2.15        | 0.0166 | 234.65 ± 56.79                | 0.0785 |
| T3&T4                        | 114 | 7.18 ± 2.57        |        | 250.69 ± 83.63                |        |
| <b>Lymph node metastasis</b> |     |                    |        |                               |        |
| Absent                       | 176 | 6.67 ± 2.32        | 0.3466 | 240.49 ± 66.82                | 0.7586 |
| Present                      | 93  | 6.95 ± 2.45        |        | 243.25 ± 75.32                |        |
| <b>Stage</b>                 |     |                    |        |                               |        |
| I, II                        | 128 | 6.36 ± 2.04        | 0.0062 | 234.49 ± 57.20                | 0.1139 |
| III, IV                      | 141 | 7.14 ± 2.57        |        | 247.76 ± 79.13                |        |
| <b>Distant metastasis</b>    |     |                    |        |                               |        |
| Absent                       | 254 | 6.78 ± 2.34        | 0.7242 | 241.25 ± 69.79                | 0.8514 |
| Present                      | 15  | 6.56 ± 2.83        |        | 244.73 ± 71.40                |        |

\*Student's t test was used for the comparison of means. SD, standard deviation; WBC, white blood cell
