# Supplementary material for: Prognostic Role of Systemic Inflammatory Markers in Patients Undergoing Surgical Resection for Oral Squamous Cell Carcinoma
Source: MDPI journal article supplement (doi:10.3390/biomedicines10061268), 2022-05-29
Supplement: s1 [file s1]

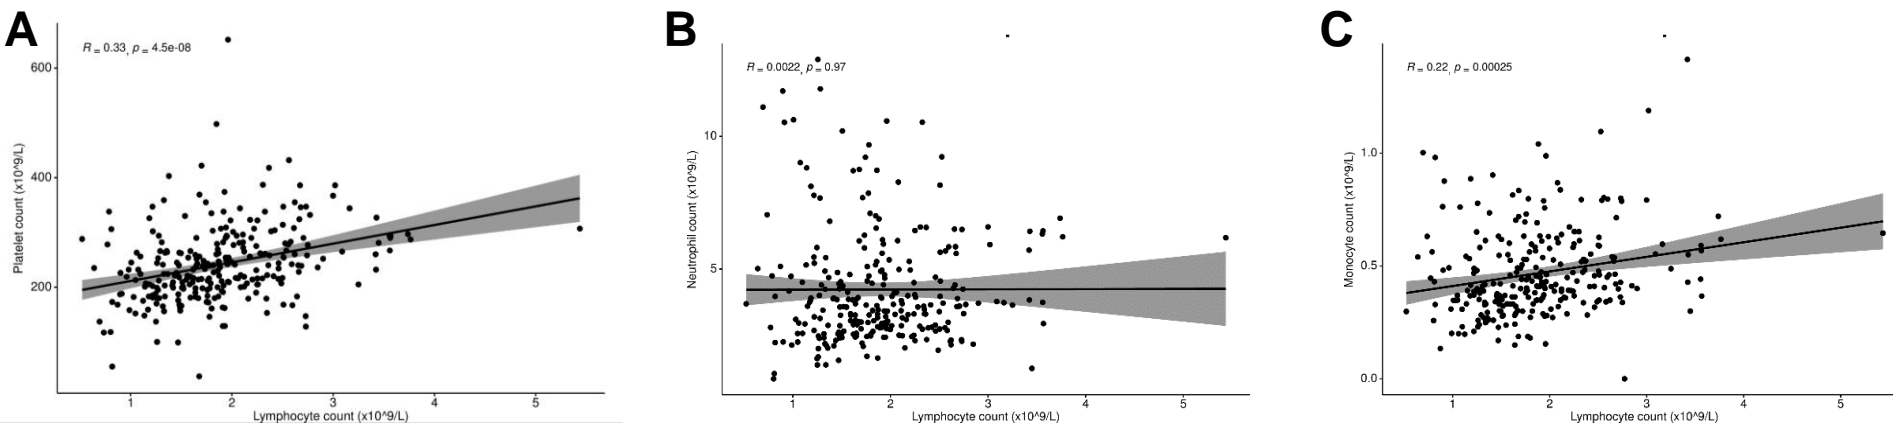

Supplementary Figure S1. Pearson's correlation between lymphocyte count and (A) platelet count, (B) neutrophil count, and (C) monocyte count
