# Supplementary material for: Prognostic Role of Systemic Inflammatory Markers in Patients Undergoing Surgical Resection for Oral Squamous Cell Carcinoma
Source: MDPI journal article supplement (doi:10.3390/biomedicines10061268), 2022-05-29
Supplement: s1 [file s1]

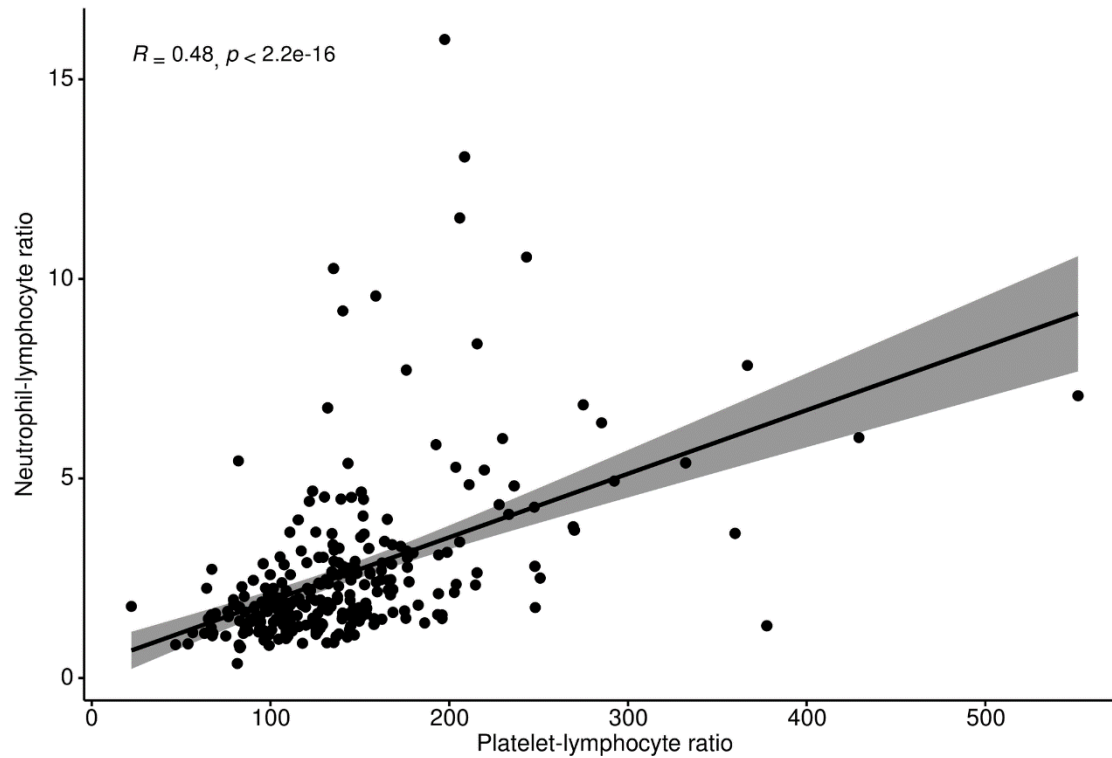

Supplementary Figure S2. Pearson's correlation between platelet-lymphocyte ratio and neutrophil-lymphocyte ratio.
